# Supplementary material
Source: PubMed Central journal article supplement (PMC3602238)
Supplement: NIHMS439972-supplement-01.pdf [file NIHMS439972-supplement-01.pdf]

| <b>Supplementary Table</b>                                                      | <b>Gene</b>                                                                                                                                                      | <b>KO/WT mRNA ratio</b> |      |
|---------------------------------------------------------------------------------|------------------------------------------------------------------------------------------------------------------------------------------------------------------|-------------------------|------|
| expression of potential miR21 target genes in Bcl6KO Tregs compared to WT Tregs | Satb1                                                                                                                                                            | 0.44 *                  |      |
|                                                                                 | Spry1                                                                                                                                                            | 0.47 *                  |      |
|                                                                                 | Krit1                                                                                                                                                            | 0.54                    |      |
|                                                                                 | Il12a                                                                                                                                                            | 0.57                    |      |
|                                                                                 | Kcna3                                                                                                                                                            | 0.57                    |      |
|                                                                                 | Plag1                                                                                                                                                            | 0.57                    |      |
|                                                                                 | Spry2                                                                                                                                                            | 0.57                    |      |
|                                                                                 | Tgfb1                                                                                                                                                            | 0.57                    |      |
|                                                                                 | Microarray expression levels of the indicated genes were normalized to average gapdh + tubb5 + RPL35 expression levels for WT and KO then gene ratios calculated | Arhgap24                | 0.62 |
|                                                                                 |                                                                                                                                                                  | Cntfr                   | 0.62 |
|                                                                                 |                                                                                                                                                                  | Matn2                   | 0.62 |
|                                                                                 |                                                                                                                                                                  | Nfib                    | 0.62 |
|                                                                                 |                                                                                                                                                                  | Ntf3                    | 0.62 |
| Pitx2                                                                           |                                                                                                                                                                  | 0.62                    |      |
| Sox2                                                                            |                                                                                                                                                                  | 0.62                    |      |
| Xkr6                                                                            |                                                                                                                                                                  | 0.62                    |      |
| Bcl2                                                                            |                                                                                                                                                                  | 0.66                    |      |
| Dazl                                                                            |                                                                                                                                                                  | 0.66                    |      |
| Pdcd4                                                                           |                                                                                                                                                                  | 0.66                    |      |
| Reck                                                                            |                                                                                                                                                                  | 0.66                    |      |
| Tiam1                                                                           |                                                                                                                                                                  | 0.66                    |      |
| Aspn                                                                            |                                                                                                                                                                  | 0.71                    |      |
| Btg2                                                                            |                                                                                                                                                                  | 0.71                    |      |
| Pik3r1                                                                          |                                                                                                                                                                  | 0.71                    |      |
| Psrc1                                                                           |                                                                                                                                                                  | 0.71                    |      |
| Rasgrp1                                                                         | 0.71                                                                                                                                                             |                         |      |
| Rhob                                                                            | 0.71                                                                                                                                                             |                         |      |
| Brd1                                                                            | 0.76                                                                                                                                                             |                         |      |
| Fasl                                                                            | 0.76                                                                                                                                                             |                         |      |
| Jag1                                                                            | 0.76                                                                                                                                                             |                         |      |
| Pcbp2                                                                           | 0.76                                                                                                                                                             |                         |      |
| Tbfr2                                                                           | 0.76                                                                                                                                                             |                         |      |
| Yod1                                                                            | 0.76                                                                                                                                                             |                         |      |
| Hnrpu                                                                           | 0.81                                                                                                                                                             |                         |      |
| Rnf103                                                                          | 0.81                                                                                                                                                             |                         |      |
| Stag2                                                                           | 0.81                                                                                                                                                             |                         |      |
| Zcchc3                                                                          | 0.81                                                                                                                                                             |                         |      |
| Ski                                                                             | 0.87                                                                                                                                                             |                         |      |
| Spg20                                                                           | 0.87                                                                                                                                                             |                         |      |
| Wwp1                                                                            | 0.87                                                                                                                                                             |                         |      |
| Cbx4                                                                            | 0.93                                                                                                                                                             |                         |      |
| Mrpl9                                                                           | 0.93                                                                                                                                                             |                         |      |
| Pcbp1                                                                           | 0.93                                                                                                                                                             |                         |      |
| Ppara                                                                           | 0.93                                                                                                                                                             |                         |      |
| Pten                                                                            | 0.93                                                                                                                                                             |                         |      |
| Smad7                                                                           | 0.93                                                                                                                                                             |                         |      |
| Bmpr2                                                                           | 1                                                                                                                                                                |                         |      |
| Cdc25a                                                                          | 1.1                                                                                                                                                              |                         |      |
| Mtap                                                                            | 1.1                                                                                                                                                              |                         |      |
| Apaf1                                                                           | 1.2                                                                                                                                                              |                         |      |
| Peli1                                                                           | 1.2                                                                                                                                                              |                         |      |
| Ccl1                                                                            | 1.4                                                                                                                                                              |                         |      |
| Map2k3                                                                          | 1.5                                                                                                                                                              |                         |      |
| Casp3                                                                           | 1.8                                                                                                                                                              |                         |      |
| mRNA expression data from:<br>Sawant et al (2012)<br>J.Immunol. 189, 4759       |                                                                                                                                                                  |                         |      |
| miR21 targets from:<br>Hatley et al (2010)<br>Cancer Cell 18, 282               |                                                                                                                                                                  |                         |      |
| Lu et al (2009)<br>J.Immunol. 182, 4994                                         |                                                                                                                                                                  |                         |      |
| *asterisks show gene decreased more than 2-fold in KO Tregs                     |                                                                                                                                                                  |                         |      |
